# Supplementary material for: Creating a foundation for origin of life outreach: How scientists relate to their field, the public, and religion
Source: PubMed Central journal article supplement (PMC9956591; doi:10.1371/journal.pone.0282243), 2023-02-24
Supplement: pone.0282243.s001.pdf [file pone.0282243.s001.pdf]

1 **Figure S1: Communication aspects priority for communication profiles**

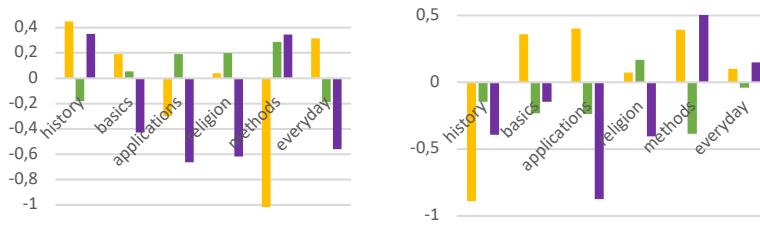

2 To compute the values in figure, we considered the average priority A given by  
 3 researchers fitting the different profiles when communicating about the OoL  
 4 controversy (left panel) or the one with religion (right panel). For each of these, we then  
 5 compute the z-score:

$$z = (A - m) / S , \tag{1}$$

6 Where m is the average priority score of that aspect and S the associated standard  
 7 deviation (as reported in Table 1 in the main text. Researchers fitting the *teaching*  
 8 profile for the OoL debate (yellow bars in the left panel, n=10) give higher priority to  
 9 historical theories and everyday life of researchers than the average (N=46).  
 10 Meanwhile, they would rather leave discussions about methods and processes of  
 11 research. Scientists fitting the *advocating* profile (green bars, n=21) mostly conform to  
 12 the average. However, they are the ones giving the highest priority to the relationship  
 13 with religion, the only ones to give more than average priority to potential applications,  
 14 and the only ones giving less than average priority to historical theories. Very few  
 15 scientists fit the *discussing* profile (purple bars, n=3), which explains the wide  
 16 deviations. They are the only ones giving less than average scores to scientific basics  
 17 or relationship with religion.

18 The right panel presents analogous data, but using the communication profiles related  
 19 to the controversy with religion. In this case, the *teaching* profile (yellow bars, n=5)  
 20 shifts to lower than average priority for history, while switching to higher than average  
 21 priority with regards to scientific basics and potential applications. Scientists fitting the  
 22 *advocating* profile (green bars, n=10) give less than average priority to every aspect,  
 23 except for the relationship with religion. The *discussing* profile (purple bars, n=3) is  
 24 again the least populated. Scientists fitting this profile in the religion controversy have  
 25 similar priorities as their counterparts in the OoL debate, except for a reduced interest  
 26 in history and an increased priority given to the everyday work of researchers.
