# Supplementary material for: Creating a foundation for origin of life outreach: How scientists relate to their field, the public, and religion
Source: PubMed Central journal article supplement (PMC9956591; doi:10.1371/journal.pone.0282243), 2023-02-24
Supplement: pone.0282243.s002.pdf [file pone.0282243.s002.pdf]

27  
28

**Figure S2: Additional demographics for controversy and communication profiles**

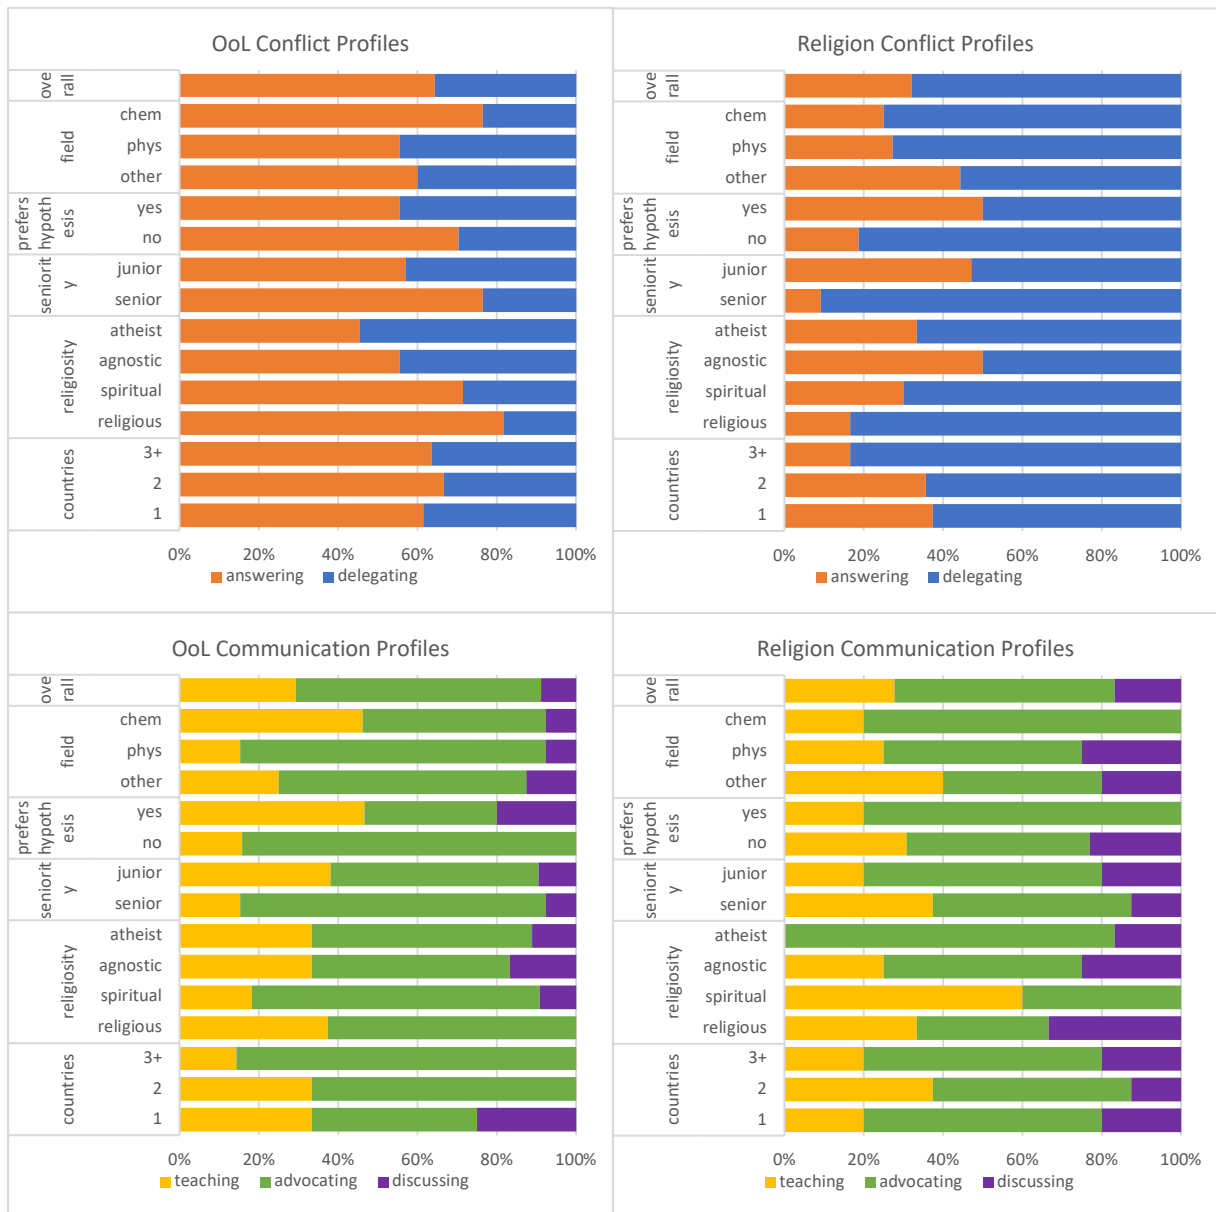

29 The top two panels show the distribution of the controversy profile for the OoL debate  
 30 (left, n=45) and the for the controversy with religion (right, n=28) according to discipline,  
 31 to whether the scientists expressed preference for any OoL-hypothesis, their career  
 32 stage, religiosity and number of countries visited during their career.

33 The bottom two panels show analogous distribution of the communication profile on  
 34 the OoL debate (left, n=34) and the debate with religion (right, n=18).
