# Supplementary material for: Creating a foundation for origin of life outreach: How scientists relate to their field, the public, and religion
Source: PubMed Central journal article supplement (PMC9956591; doi:10.1371/journal.pone.0282243), 2023-02-24
Supplement: pone.0282243.s005.pdf [file pone.0282243.s005.pdf]

S3 Table: Communication profile definitions

| Profile           | Defining classes                                                                                                                              |
|-------------------|-----------------------------------------------------------------------------------------------------------------------------------------------|
| <b>Advocating</b> | <b>Communication role</b> (cluster H) is:<br>"Advocate" (H1)                                                                                  |
| <b>Teaching</b>   | <b>Communication role</b> (cluster H) is:<br>"Popularizer" (H4)<br><b>AND</b><br><b>Communication model</b> (cluster G) is<br>"Deficit" (G1)  |
| <b>Discussing</b> | <b>Communication role</b> (cluster H) is:<br>"Reporter" (H3)<br><b>AND</b><br><b>Communication model</b> (cluster G) is NOT<br>"Deficit" (G1) |
